# Supplementary material
Source: MDPI journal article supplement (https://www.mdpi.com/2673-4605/6/1/8)

**CMDWC  
2021**

# 1st Corrosion and Materials Degradation Web Conference

17-19 MAY 2021 | ONLINE

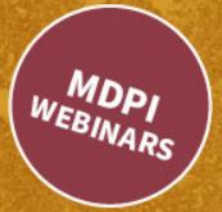

## Effect of temperature on curing time of single-lap adhesive joints in marine applications

**Alderucci Tiziana, Borsellino Chiara, Di Bella Guido and Favaloro Federica**

Department of Engineering, University of Messina

tiziana.alderucci@unime.it; chiara.borsellino@unime.it; guido.dibella@unime.it;

federica.favaloro@unime.it

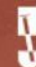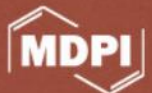

# ADHESIVE JOINTS IN MARINE APPLICATIONS

- In the framework of **marine applications**, during last decades the requirements of *lightweight* and *durability* became fundamental in the design phase.
- Materials such as *aluminum alloy* allow a significant reduction of the weight of the structures maintaining their mechanical performances.
- **Structural adhesives**, when compared with other joining technique, lead to several advantages:
  - ✓ better distribution of the stresses
  - ✓ no galvanic corrosion
  - ✓ water-proofing

# ADHESIVE JOINTS IN MARINE APPLICATIONS

- In industrial field, **manufacturing time** is one of the most important factors affecting the production costs.
- Structural adhesives require long curing times (i.e. 3-4 weeks) before the joined components can be safely employed.

**Aim:** to test the effect of thermal treatments on a commercial epoxy structural adhesive, on the final resistance of single lap joints, trying to attain the possibility of a curing time reduction.

# EXPERIMENTAL CAMPAIGN

## Single-lap adhesive joints (ASTM D1002)

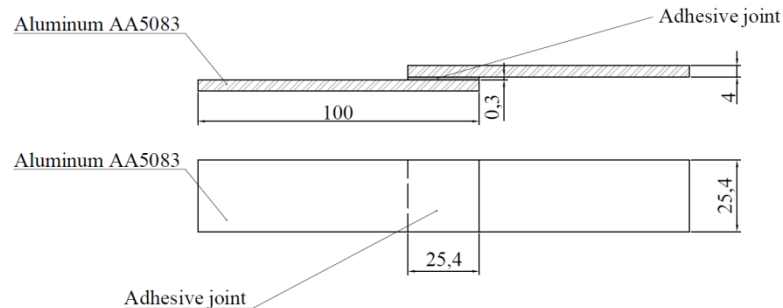

## Dog-bone (UNI EN ISO 527-2)

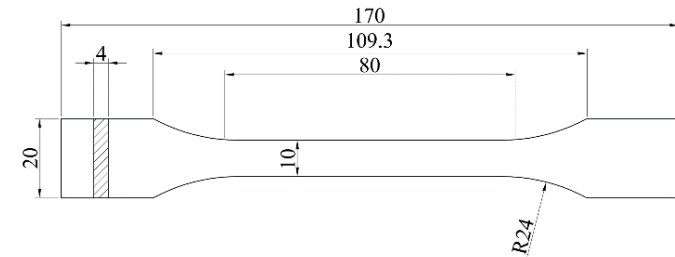

Substrate: Alluminum AA5083 H111

|                                 |     |
|---------------------------------|-----|
| Young's modulus [GPa]           | 71  |
| Ultimate tensile strength [MPa] | 250 |
| Elongation at break [%]         | 22  |
| Density [g/cm <sup>3</sup> ]    | 2.7 |

Adhesive: 3M 7260

|                              |                         |
|------------------------------|-------------------------|
| Chemical base                | Two-part epoxy adhesive |
| Consistency                  | Controlled flow         |
| Working time at 22 °C [min]  | 90-300                  |
| Application temperature [°C] | 15-25                   |
| Service temperature [°C]     | -40+120                 |
| Shear strength [MPa]         | 33.50                   |
| Young's modulus [GPa]        | 3                       |
| Elongation at break [%]      | 3                       |
| Use                          | Structural              |

# EXPERIMENTAL CAMPAIGN

## Curing temperature:

- **T0**, Laboratory temperature 22°C
- **T50**, Climatic chamber temperature 50°C

## Experimental Curing time (+24h laboratory conditions)

- 2h
- 24h
- 48h
- 96h
- 8 days

## Standard Curing time

- 28 days

## Increased Curing time

- 3 months

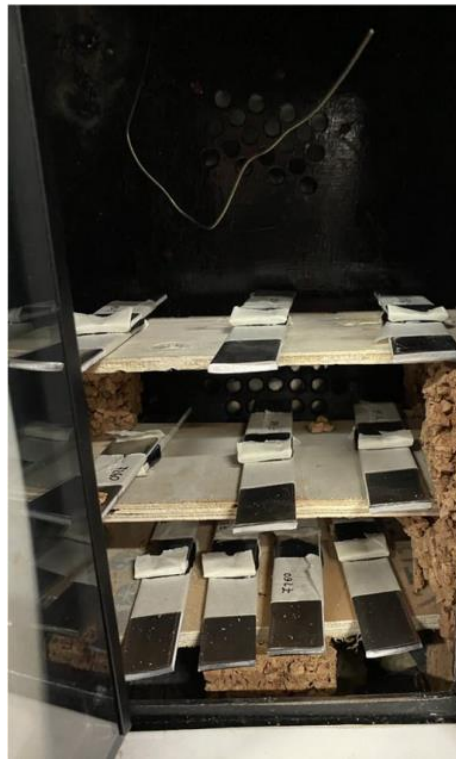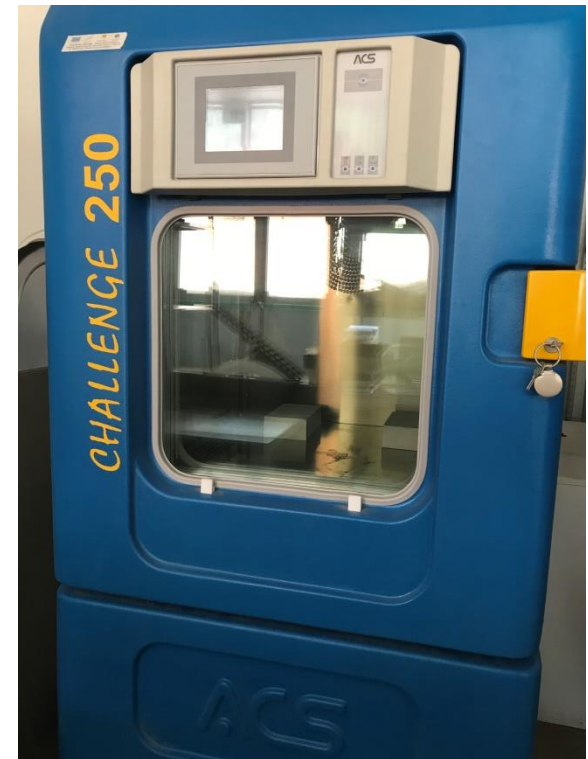

# EXPERIMENTAL RESULTS

Tensile tests on a **Zwick/Roell Z600** Universal testing machine 600 kN load cell

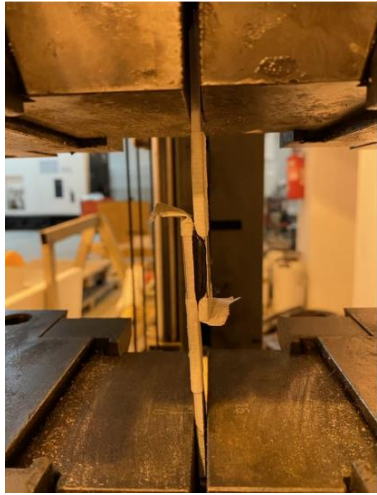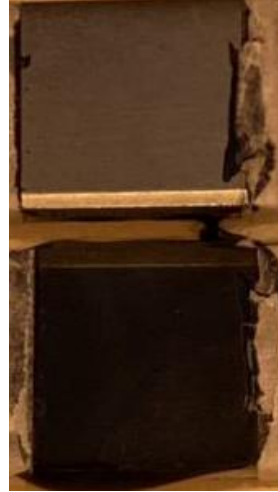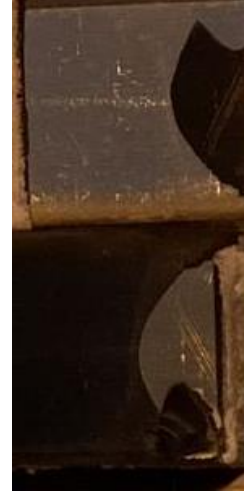

**Adhesive failure**

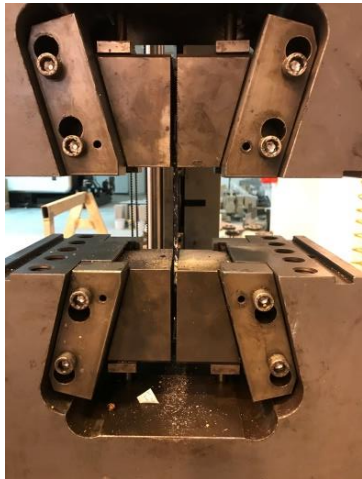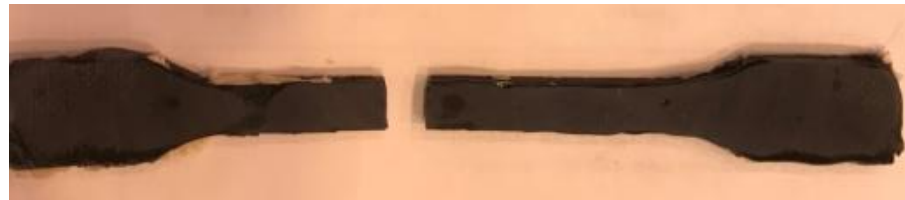

# EXPERIMENTAL RESULTS

## Representative curves

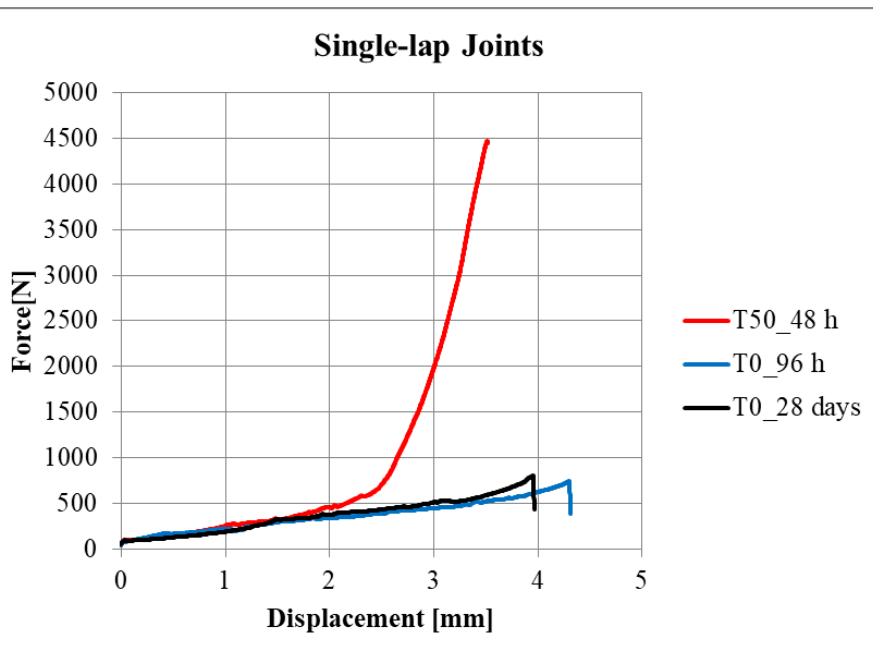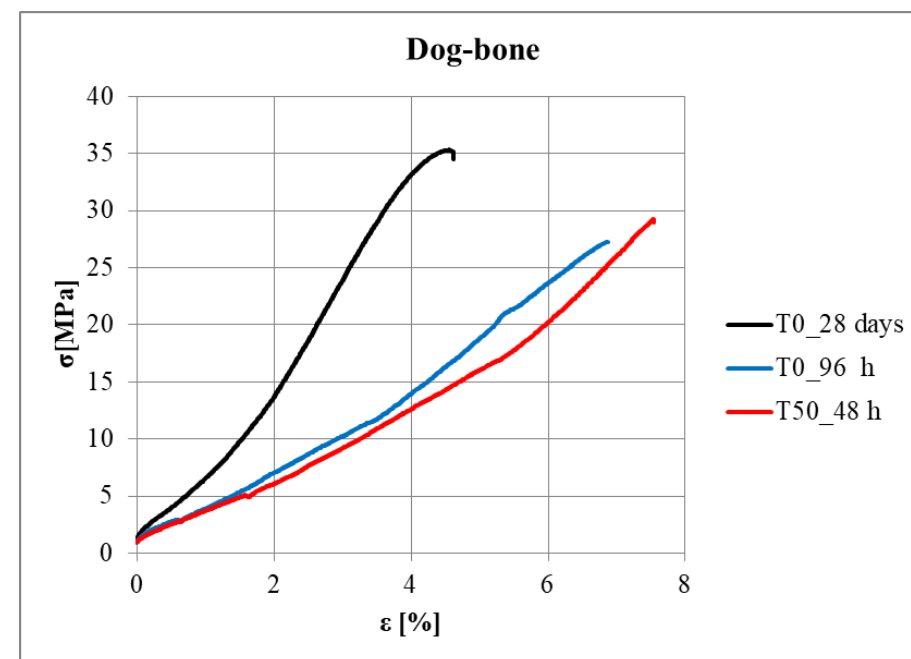

- With regard to the *single-lap* specimens thermal treatment has significant effect on the final resistance of the joint
- For the *dog-bone* specimens temperature and curing time do not affect the mechanical performances

# EXPERIMENTAL RESULTS

## Failure modes

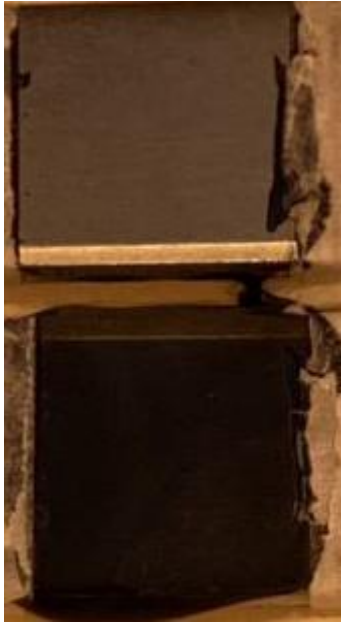

28 days

**Adhesive failure**

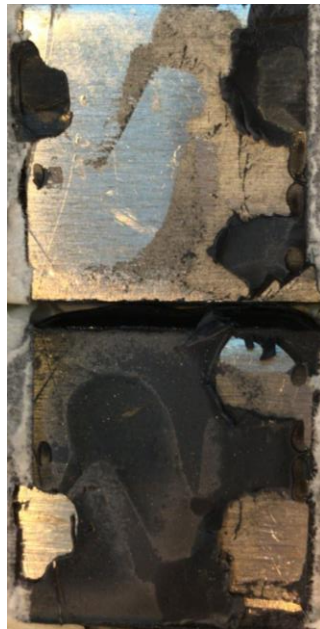

3 months

**Adhesive/cohesive failure**

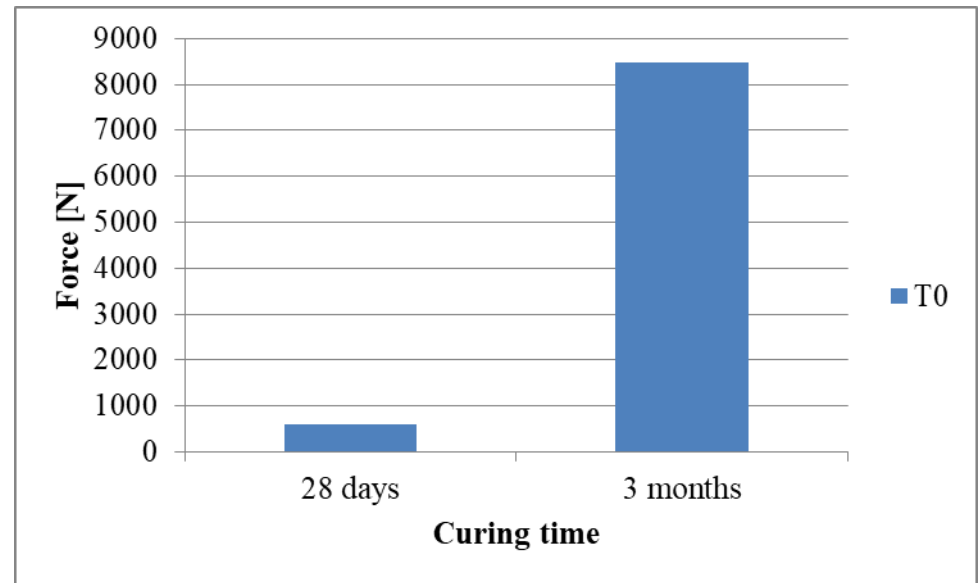

- The *standard curing time* of 28 days recommended by the manufacturers is *referred to the adhesive*.
- The curing time of the joint is influenced by the *interface* between adhesive and substrate.



# EXPERIMENTAL RESULTS

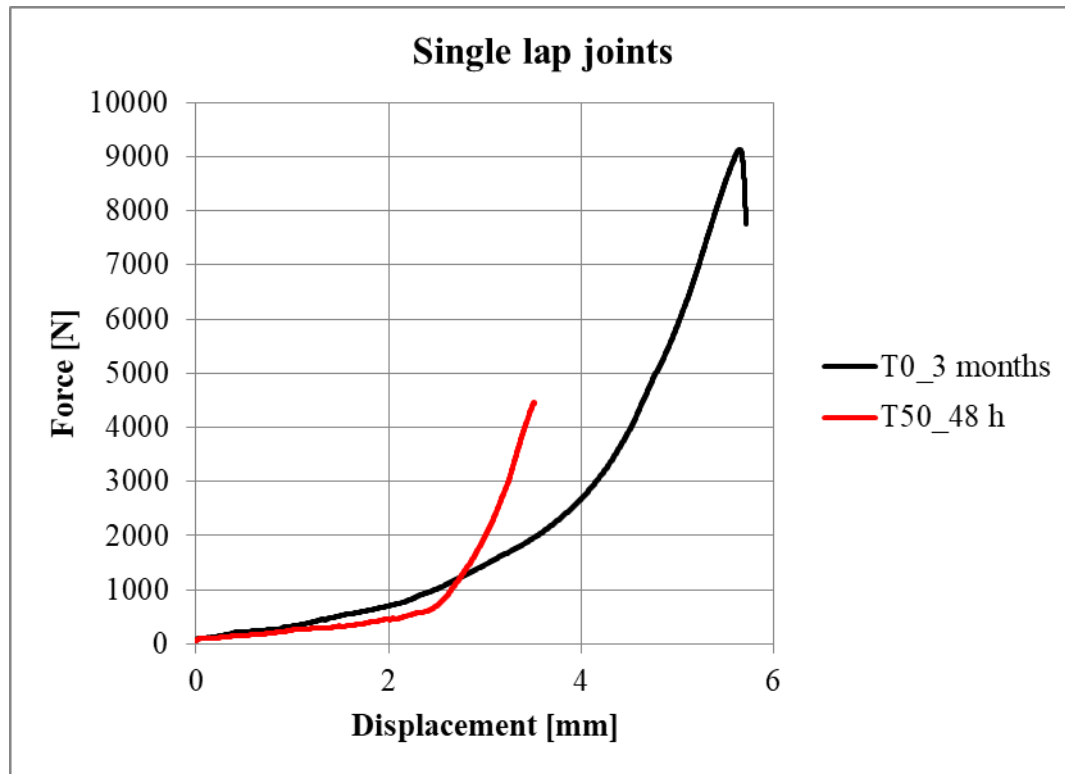

- **Thermal treatment** allow to obtain sufficient mechanical performances with a *drastic reduction of the curing time*

- The adhesive, exposed to heat, undergoes to a *reduction* of its *viscosity*, with consequent *improvement* of the *wettability* of the surface.

# STATISTICAL ANALYSIS\_Dog-bone

- The analysis of the experimental data has been performed by means of the MINITAB® software, in order to investigate the significance of the two factors:  
temperature and curing time

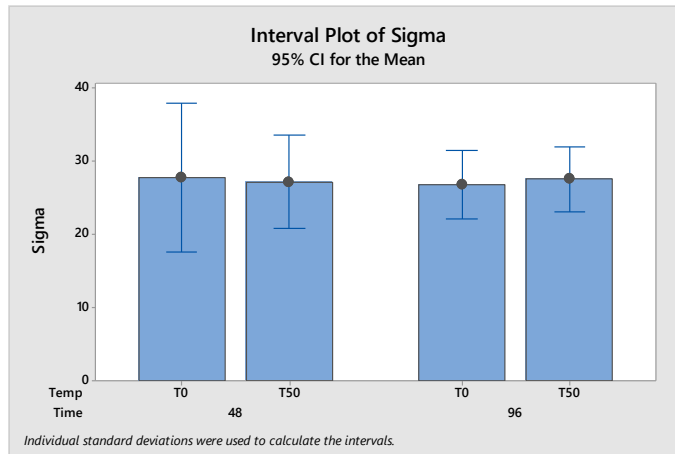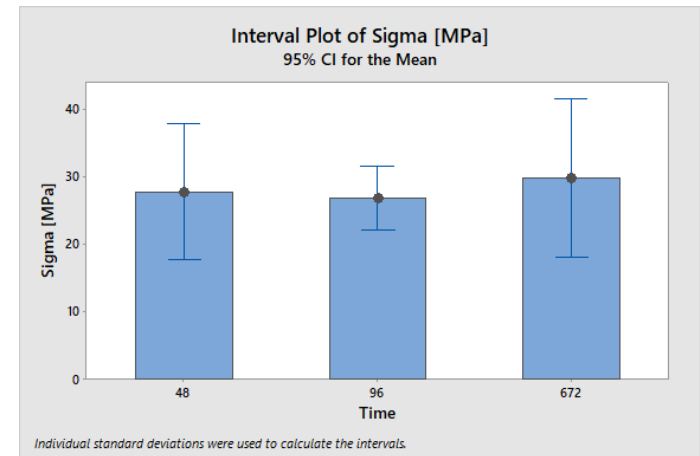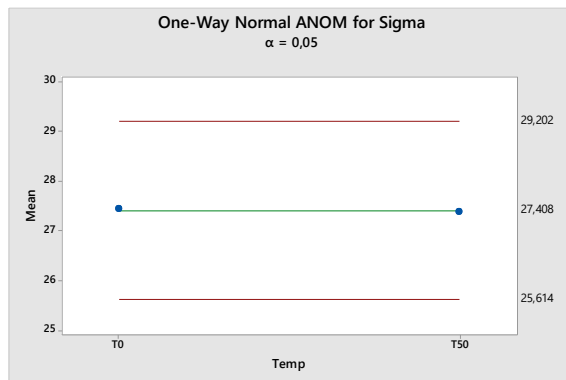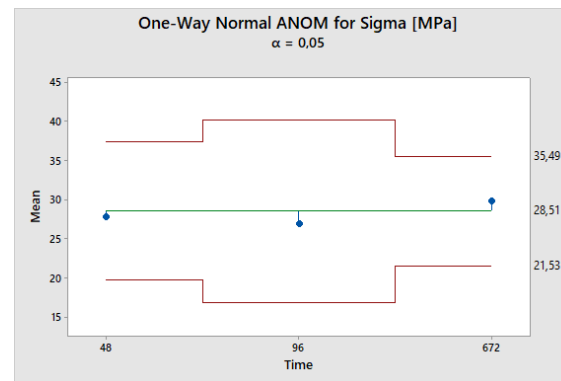

For the dog-bone specimens it can be confirmed that *neither* the *temperature* nor the *curing time* are statistically significant on the mechanical performances of the adhesive.

# STATISTICAL ANALYSIS\_Single-lap Joint

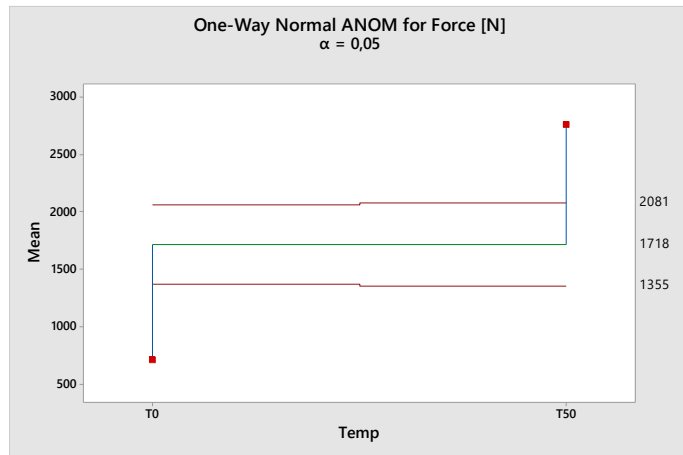

- The temperature has a significant effect on the mechanical performances of the single-lap joint;
- It can be evidenced that exposition to 50°C leads to an important reduction of the curing time, with higher efficiency in term of carrying load capability.

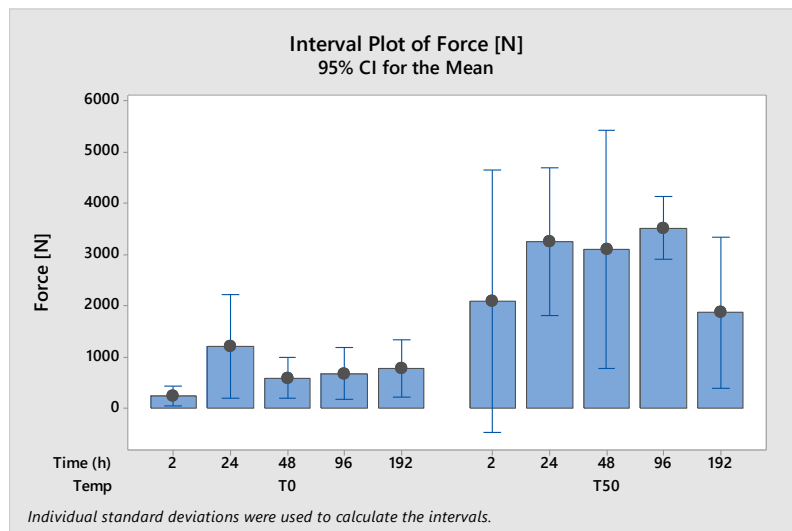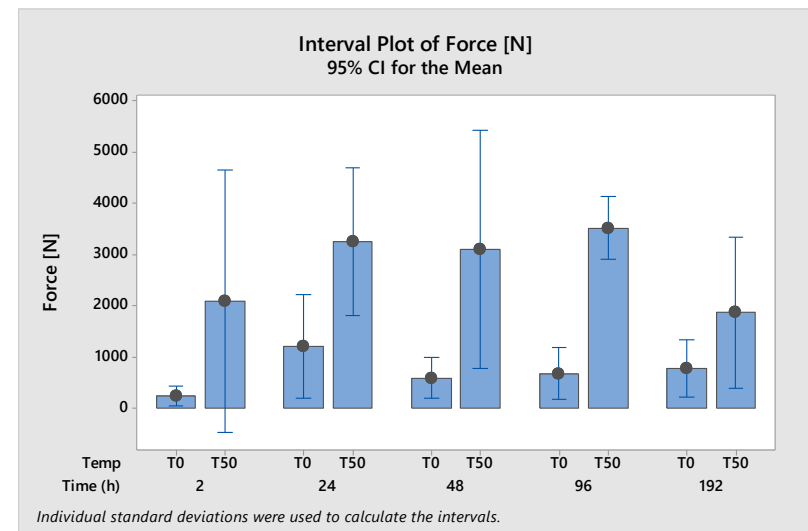

# STATISTICAL ANALYSIS\_Single-lap Joint

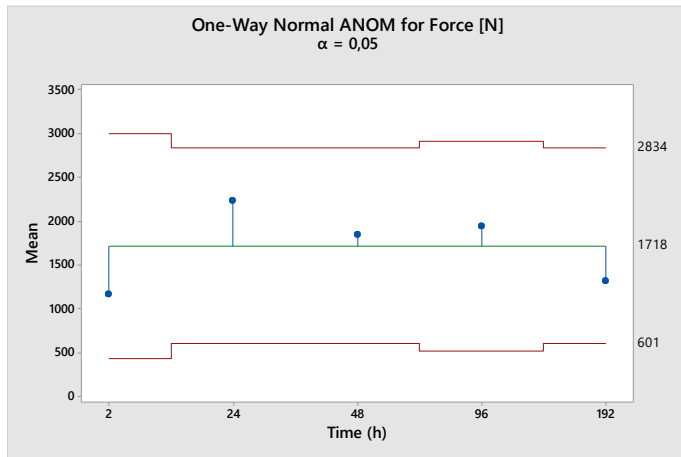

- Curing time has no statistical relevance on the joint resistance

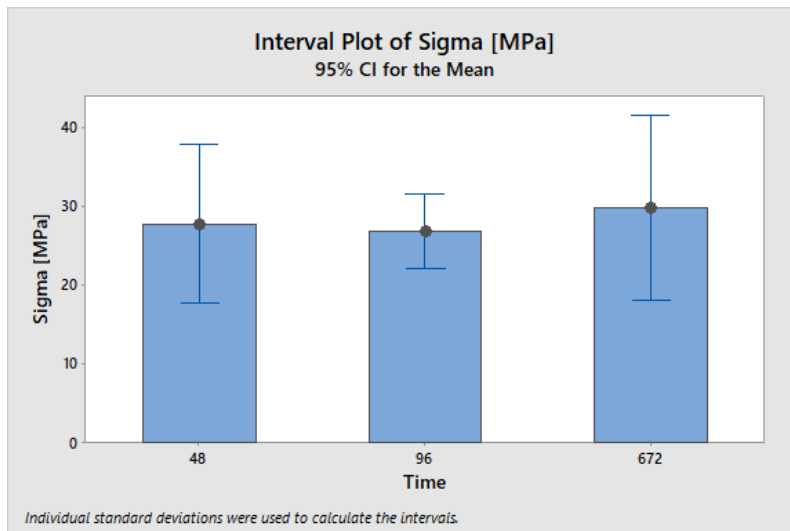

- Exposition to higher temperatures during the curing phase leads to an improvement of the adhesion at the interface with the substrates

# CONCLUSIONS

- In the present research work the *effect* of exposition to *high temperature* during the *curing phase* of epoxy adhesive joints has been analysed.
- Tensile tests on *single-lap* and *dog-bone* specimens, cured at different *times* and *temperature*, have been conducted.
- A *statistical analysis* on the experimental results has been performed.
- It has been demonstrated that the thermal treatment led to a **significant reduction** of the **curing time** and also to an improvement of the adhesion at the interface with the aluminum substrate, with a consequent improvement of the mechanical performances of the joint.

**Prospective work:** in order to further improve the final resistance of the joint, to test the effect of

- ✓ thermal treatments at different temperatures
- ✓ chemical and mechanical treatments

**CMDWC**  
**2021**

# 1st Corrosion and Materials Degradation Web Conference

17-19 MAY 2021 | ONLINE

MDPI  
WEBINARS

## Thank you!!

tiziana.alderucci@unime.it;  
chiara.borsellino@unime.it;  
guido.dibella@unime.it;  
federica.favaloro@unime.it

Chaired by: **PROF. RAMAN SINGH, PROF. DIGBY MACDONALD AND PROF. RHYS JONES**

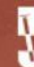

*corrosion and  
materials degradation*



Supplement: s1 [file s1]
